# Supplementary material for: Decreased Expression of SRSF2 Splicing Factor Inhibits Apoptotic Pathways in Renal Cancer
Source: PubMed Central journal article supplement (PMC5085631; doi:10.3390/ijms17101598), 2016-09-28
Supplement: ijms-17-01598-s001.pdf [file ijms-17-01598-s001.pdf]

# Supplementary Materials: Decreased Expression of SRSF2 Splicing Factor Inhibits Apoptotic Pathways in Renal Cancer

Hanna Kędzierska, Piotr Popławski, Grażyna Hoser, Beata Rybicka, Katarzyna Rodzik, Elżbieta Sokół, Joanna Bogusławska, Zbigniew Tański, Anna Fogtman, Marta Koblowska and Agnieszka Piekiełko-Witkowska

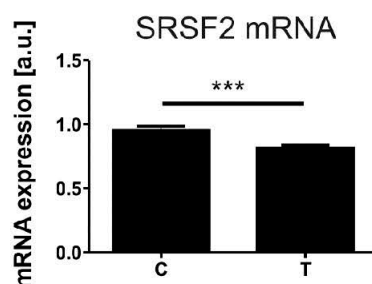

**Figure S1.** The expression of SRSF2 mRNA in tissue samples. The graph shows results of qPCR analysis performed on control (C,  $n = 30$ ) and tumour (T,  $n = 30$ ) matched-paired tissue samples. Statistical analysis was performed using  $t$ -test. \*\*\*  $p < 0.001$ . a.u.—arbitrary units.

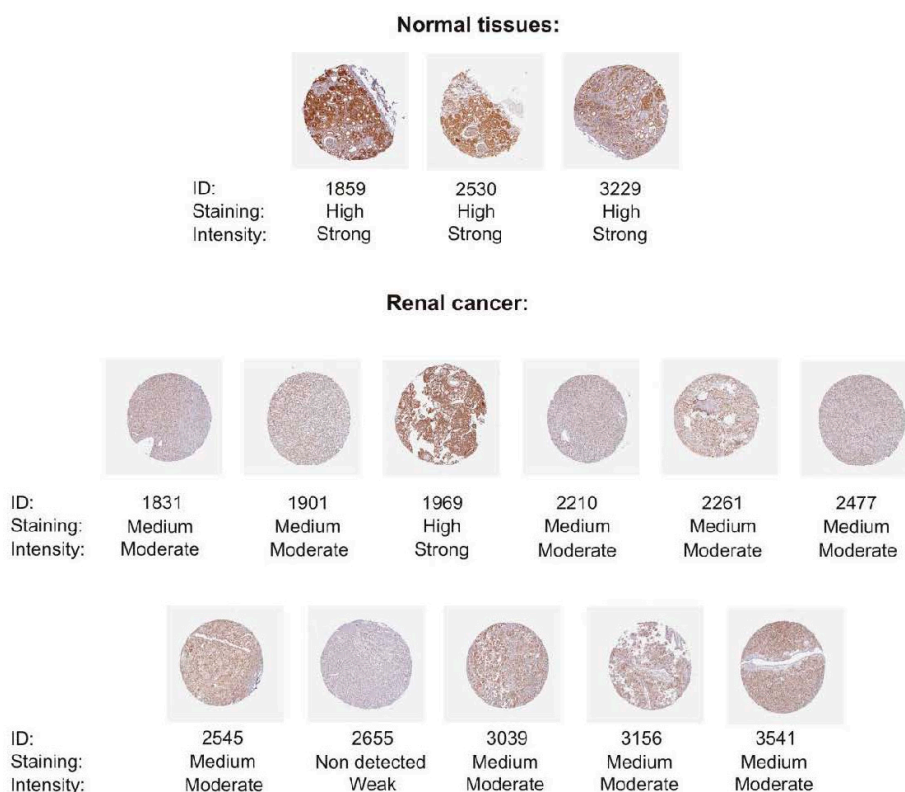

**Figure S2.** Immunohistochemical evaluation of SRSF2 protein in normal kidneys (**upper panel**,  $n = 3$ ) and renal cancer (**lower panel**,  $n = 11$ ). The data were retrieved on 29 August 2016 from Human Protein Atlas version 15, available from [www.proteinatlas.org](http://www.proteinatlas.org) [16,62–75].

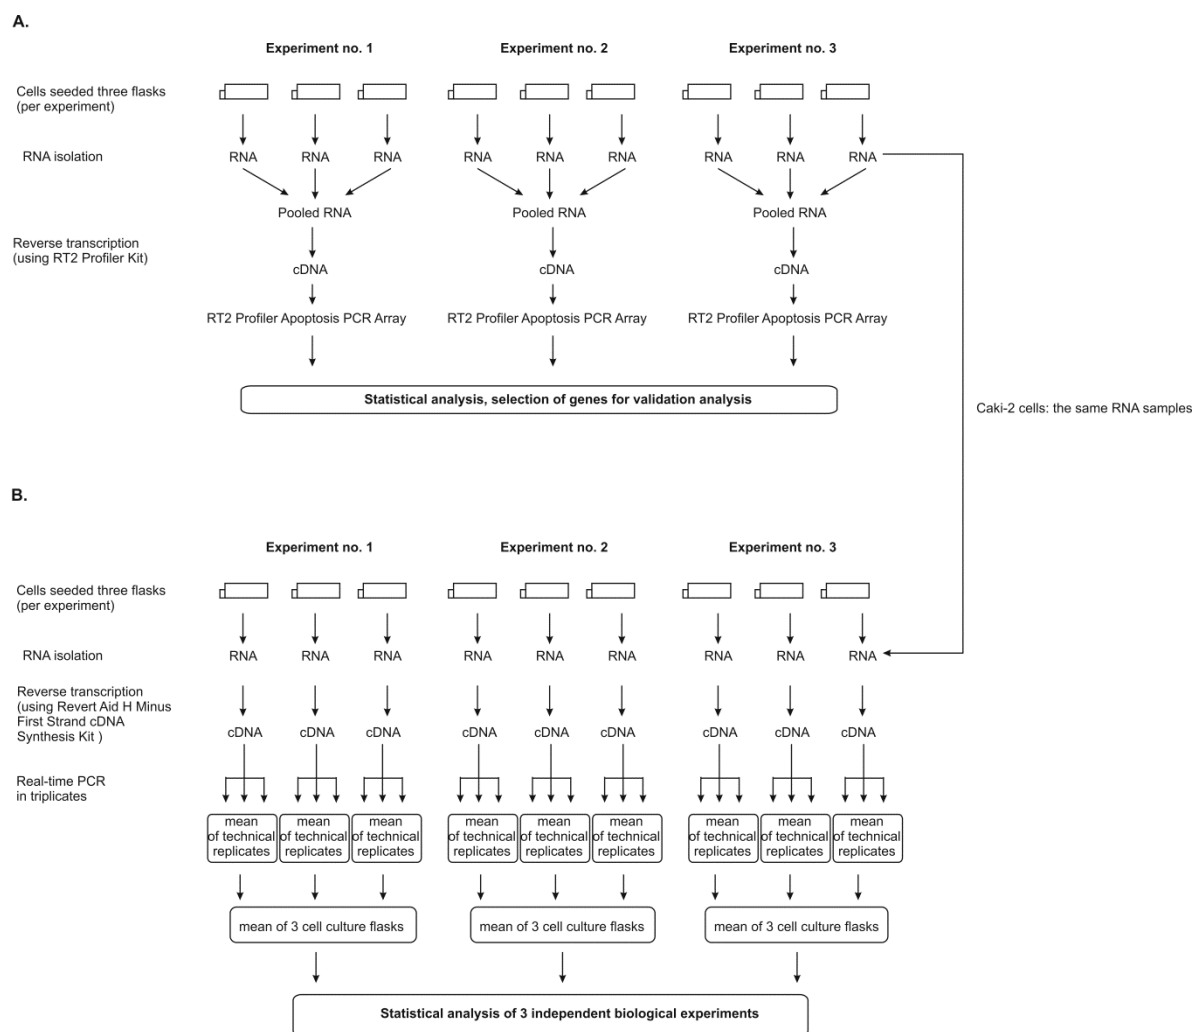

**Figure S3.** The experimental setup of the study. On separate days three independent cell culture experiments were started, each in three replicates (cells seeded in three cell culture flasks). Then, after performing siRNA transfections (not shown), RNA was isolated from each cell culture flask separately. The study was performed in two steps. **(A)** Initial analysis: aim: to select genes potentially regulated by SRSF2. Initial analysis was performed only in Caki-2 cells. RNAs from three culture flasks per experiment were pooled. Pooled RNA samples were reversely transcribed using reverse transcriptase enclosed in RT2 Profiler Kit. Then, the obtained cDNA samples were used as templates in RT2 Profiler Apoptosis PCR Arrays; **(B)** Validation analysis: aim: to identify genes regulated by SRSF2. Validation analysis was performed on Caki-2, UOK171, KIJ-265T, and KIJ-306T cells. In case of Caki-2 cells, RNA samples obtained in Initial analysis were used. Each of the RNA samples obtained from each cell culture flask was separately reversely transcribed using RevertAid H Minus First Strand cDNA Synthesis Kit. Next, each of the cDNA samples was separately used as a substrate in real-time PCR that was performed with SYBR Green I Master in triplicates (technical replicates). Next, means were calculated from technical replicates. Then, three means of technical replicates, corresponding to three cell culture flasks were used to calculate a mean that corresponded to single independent experiment, and used for statistical analysis.

A.

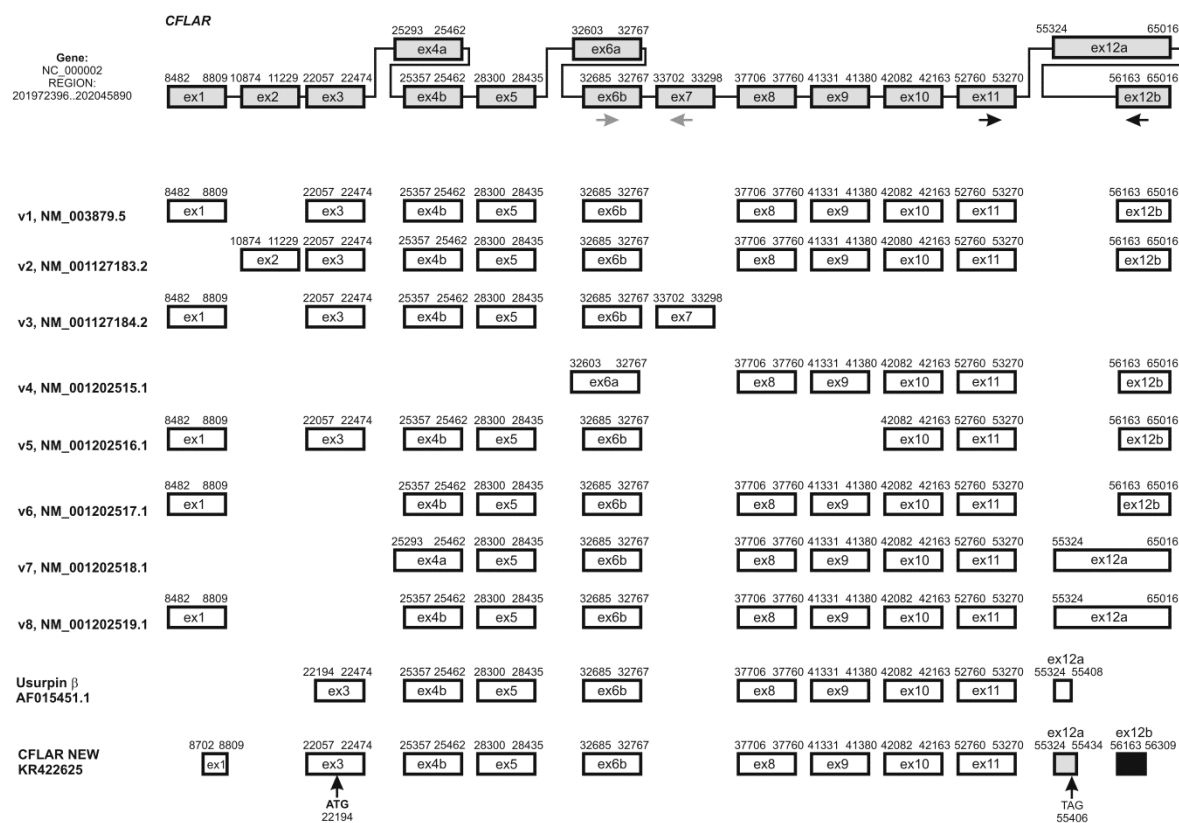

B.

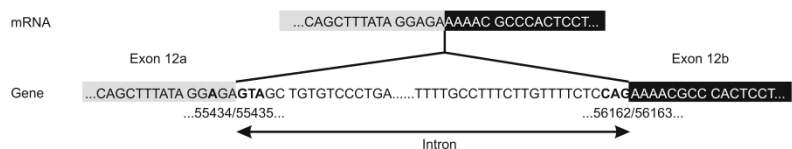

**Figure S4.** Graphical representation of CFLAR gene and transcripts along with the new splice variant cloned in the study. **(A)** Alternative splicing of CFLAR. The upper drawing shows scheme of CFLAR gene (GenBank accession number: NC\_000002, chromosomal region: 201972396202045890). The drawings below show eight canonical splice variants and the new splice variant, consecutively named with their GenBank accession numbers. The exons are shown as boxes. Numbers above exons refer to nucleotide positions in CFLAR gene. The position of ATG and STOP (TAG) codon in the new variant are shown with arrows. The positions of primers used for detection of transcript variants are shown with arrows: grey (for transcript variant 3) and black (for transcripts 1, 2, 4, 5, 6 and the new splice variant identified in this study); **(B)** Verification of the new exon junction in the cloned CFLAR splice variant. Upper drawing shows the fragment of cloned splice variant, lower drawing shows the corresponding gene region. The fragments of exons 12a and 12b that form a new exon junction are coloured grey and black, respectively. The position of an intron is shown with an arrow. The numbers above the arrow refer to nucleotide numbering in the gene. The bolded nucleotides follow the consensus of splice sites: GT/AG (5' splice site: MAG|GTRAGT and 3' splice site: CAG|G, where M is A or C and R is A or G). Dashed line represents exon/intron boundary.

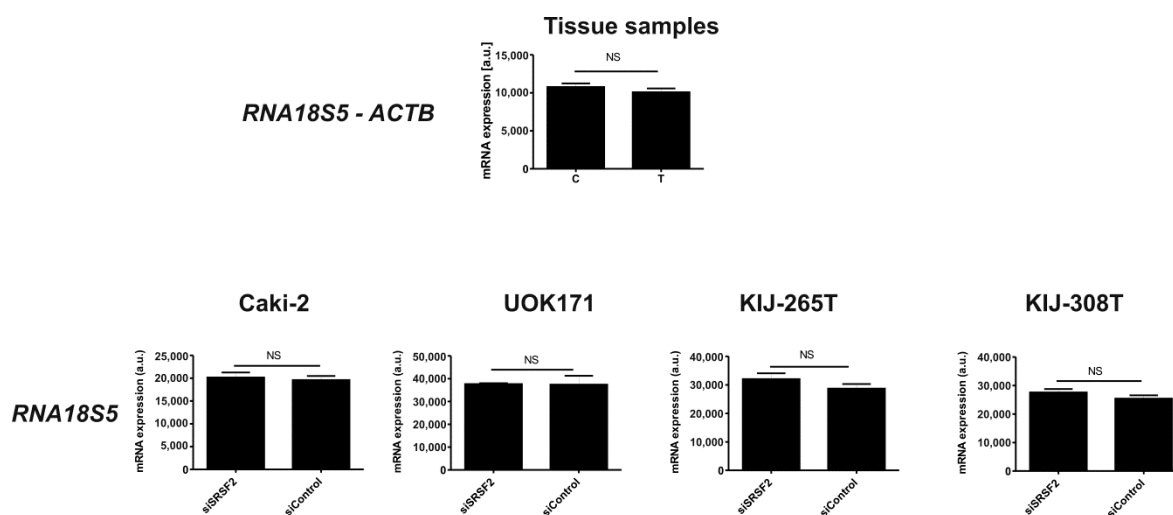

**Figure S5.** Confirmation of stable expression of reference genes. **Upper panel:** stable expressions means of RNA18S5 and ACTB (actin beta) in tissue samples. C—control samples. T—tumour samples; **Lower panel:** the expression of RNA18S5 in four RCC-derived cell lines (Caki-2, UOK171, KIJ-265T, and KIJ-308T) that were transfected with siRNA targeting SRSF2 (siSRSF2) or control scrambled siRNA (siControl). RNA18S5 was selected after evaluation of additional reference gene candidates, TBP—TATA-box binding protein and HPRT1—hypoxanthine phosphoribosyltransferase 1; NS—no statistical significance.

**Table S1.** Apoptotic genes whose expression was evaluated using RT2 Profiler Apoptosis PCR Arrays.

| Number in Array | GenBank Accession Number | Gene Symbol    | Description                                                                           |
|-----------------|--------------------------|----------------|---------------------------------------------------------------------------------------|
| 1               | NM_005157                | <i>ABL1</i>    | C-abl oncogene 1, non-receptor tyrosine kinase                                        |
| 2               | NM_004208                | <i>AIFM1</i>   | Apoptosis-inducing factor, mitochondrion-associated, 1                                |
| 3               | NM_005163                | <i>AKT1</i>    | V-akt murine thymoma viral oncogene homolog 1                                         |
| 4               | NM_001160                | <i>APAF1</i>   | Apoptotic peptidase activating factor 1                                               |
| 5               | NM_004322                | <i>BAD</i>     | BCL2-associated agonist of cell death                                                 |
| 6               | NM_004323                | <i>BAG1</i>    | BCL2-associated athanogene                                                            |
| 7               | NM_004281                | <i>BAG3</i>    | BCL2-associated athanogene 3                                                          |
| 8               | NM_001188                | <i>BAK1</i>    | BCL2-antagonist/killer 1                                                              |
| 9               | NM_004324                | <i>BAX</i>     | BCL2-associated X protein                                                             |
| 10              | NM_003921                | <i>BCL10</i>   | B-cell CLL/lymphoma 10                                                                |
| 11              | NM_000633                | <i>BCL2</i>    | B-cell CLL/lymphoma 2                                                                 |
| 12              | NM_004049                | <i>BCL2A1</i>  | BCL2-related protein A1                                                               |
| 13              | NM_138578                | <i>BCL2L1</i>  | BCL2-like 1                                                                           |
| 14              | NM_020396                | <i>BCL2L10</i> | BCL2-like 10 (apoptosis facilitator)                                                  |
| 15              | NM_006538                | <i>BCL2L11</i> | BCL2-like 11 (apoptosis facilitator)                                                  |
| 16              | NM_004050                | <i>BCL2L2</i>  | BCL2-like 2                                                                           |
| 17              | NM_016561                | <i>BFAR</i>    | Bifunctional apoptosis regulator                                                      |
| 18              | NM_001196                | <i>BID</i>     | BH3 interacting domain death agonist                                                  |
| 19              | NM_001197                | <i>BIK</i>     | BCL2-interacting killer (apoptosis-inducing)                                          |
| 20              | NM_001166                | <i>BIRC2</i>   | Baculoviral IAP repeat containing 2                                                   |
| 21              | NM_001165                | <i>BIRC3</i>   | Baculoviral IAP repeat containing 3                                                   |
| 22              | NM_001168                | <i>BIRC5</i>   | Baculoviral IAP repeat containing 5                                                   |
| 23              | NM_016252                | <i>BIRC6</i>   | Baculoviral IAP repeat containing 6                                                   |
| 24              | NM_004330                | <i>BNIP2</i>   | BCL2/adenovirus E1B 19kDa interacting protein 2                                       |
| 25              | NM_004052                | <i>BNIP3</i>   | BCL2/adenovirus E1B 19kDa interacting protein 3                                       |
| 26              | NM_004331                | <i>BNIP3L</i>  | BCL2/adenovirus E1B 19kDa interacting protein 3-like                                  |
| 27              | NM_004333                | <i>BRAF</i>    | V-raf murine sarcoma viral oncogene homolog B1                                        |
| 28              | NM_033292                | <i>CASP1</i>   | Caspase 1, apoptosis-related cysteine peptidase (interleukin 1, $\beta$ , convertase) |
| 29              | NM_001230                | <i>CASP10</i>  | Caspase 10, apoptosis-related cysteine peptidase                                      |
| 30              | NM_012114                | <i>CASP14</i>  | Caspase 14, apoptosis-related cysteine peptidase                                      |
| 31              | NM_032982                | <i>CASP2</i>   | Caspase 2, apoptosis-related cysteine peptidase                                       |
| 32              | NM_004346                | <i>CASP3</i>   | Caspase 3, apoptosis-related cysteine peptidase                                       |
| 33              | NM_001225                | <i>CASP4</i>   | Caspase 4, apoptosis-related cysteine peptidase                                       |
| 34              | NM_004347                | <i>CASP5</i>   | Caspase 5, apoptosis-related cysteine peptidase                                       |
| 35              | NM_032992                | <i>CASP6</i>   | Caspase 6, apoptosis-related cysteine peptidase                                       |
| 36              | NM_001227                | <i>CASP7</i>   | Caspase 7, apoptosis-related cysteine peptidase                                       |
| 37              | NM_001228                | <i>CASP8</i>   | Caspase 8, apoptosis-related cysteine peptidase                                       |
| 38              | NM_001229                | <i>CASP9</i>   | Caspase 9, apoptosis-related cysteine peptidase                                       |
| 39              | NM_001242                | <i>CD27</i>    | CD27 molecule                                                                         |
| 40              | NM_001250                | <i>CD40</i>    | CD40 molecule, TNF receptor superfamily member 5                                      |
| 41              | NM_000074                | <i>CD40LG</i>  | CD40 ligand                                                                           |
| 42              | NM_001252                | <i>CD70</i>    | CD70 molecule                                                                         |
| 43              | NM_003879                | <i>CFLAR</i>   | CASP8 and FADD-like apoptosis regulator                                               |
| 44              | NM_001279                | <i>CIDEA</i>   | Cell death-inducing DFFA-like effector a                                              |
| 45              | NM_014430                | <i>CIDEB</i>   | Cell death-inducing DFFA-like effector b                                              |
| 46              | NM_003805                | <i>CRADD</i>   | CASP2 and RIPK1 domain containing adaptor with death domain                           |
| 47              | NM_018947                | <i>CYCS</i>    | Cytochrome c, somatic                                                                 |
| 48              | NM_004938                | <i>DAPK1</i>   | Death-associated protein kinase 1                                                     |
| 49              | NM_004401                | <i>DFFA</i>    | DNA fragmentation factor, 45kDa, alpha polypeptide                                    |
| 50              | NM_019887                | <i>DIABLO</i>  | Diablo, IAP-binding mitochondrial protein                                             |
| 51              | NM_003824                | <i>FADD</i>    | Fas (TNFRSF6)-associated via death domain                                             |
| 52              | NM_000043                | <i>FAS</i>     | Fas (TNF receptor superfamily, member 6)                                              |
| 53              | NM_000639                | <i>FASLG</i>   | Fas ligand (TNF superfamily, member 6)                                                |
| 54              | NM_001924                | <i>GADD45A</i> | Growth arrest and DNA-damage-inducible, alpha                                         |
| 55              | NM_003806                | <i>HRK</i>     | Harakiri, BCL2 interacting protein (contains only BH3 domain)                         |
| 56              | NM_000875                | <i>IGF1R</i>   | Insulin-like growth factor 1 receptor                                                 |
| 57              | NM_000572                | <i>IL10</i>    | Interleukin 10                                                                        |
| 58              | NM_000595                | <i>LTA</i>     | Lymphotoxin alpha (TNF superfamily, member 1)                                         |
| 59              | NM_002342                | <i>LTBR</i>    | Lymphotoxin $\beta$ receptor (TNFR superfamily, member 3)                             |
| 60              | NM_021960                | <i>MCL1</i>    | Myeloid cell leukemia sequence 1 (BCL2-related)                                       |
| 61              | NM_004536                | <i>NAIP</i>    | NLR family, apoptosis inhibitory protein                                              |
| 62              | NM_003998                | <i>NFKB1</i>   | Nuclear factor of kappa light polypeptide gene enhancer in B-cells 1                  |

Table S1. Cont.

| Number in Array | GeneBank Accession Number | Gene Symbol      | Description                                                |
|-----------------|---------------------------|------------------|------------------------------------------------------------|
| 63              | NM_006092                 | <i>NOD1</i>      | Nucleotide-binding oligomerization domain containing 1     |
| 64              | NM_003946                 | <i>NOL3</i>      | Nucleolar protein 3 (apoptosis repressor with CARD domain) |
| 65              | NM_013258                 | <i>PYCARD</i>    | PYD and CARD domain containing                             |
| 66              | NM_003821                 | <i>RIPK2</i>     | Receptor-interacting serine-threonine kinase 2             |
| 67              | NM_000594                 | <i>TNF</i>       | Tumor necrosis factor                                      |
| 68              | NM_003844                 | <i>TNFRSF10A</i> | Tumor necrosis factor receptor superfamily, member 10a     |
| 69              | NM_003842                 | <i>TNFRSF10B</i> | Tumor necrosis factor receptor superfamily, member 10b     |
| 70              | NM_002546                 | <i>TNFRSF11B</i> | Tumor necrosis factor receptor superfamily, member 11b     |
| 71              | NM_001065                 | <i>TNFRSF1A</i>  | Tumor necrosis factor receptor superfamily, member 1A      |
| 72              | NM_001066                 | <i>TNFRSF1B</i>  | Tumor necrosis factor receptor superfamily, member 1B      |
| 73              | NM_014452                 | <i>TNFRSF21</i>  | Tumor necrosis factor receptor superfamily, member 21      |
| 74              | NM_003790                 | <i>TNFRSF25</i>  | Tumor necrosis factor receptor superfamily, member 25      |
| 75              | NM_001561                 | <i>TNFRSF9</i>   | Tumor necrosis factor receptor superfamily, member 9       |
| 76              | NM_003810                 | <i>TNFSF10</i>   | Tumor necrosis factor (ligand) superfamily, member 10      |
| 77              | NM_001244                 | <i>TNFSF8</i>    | Tumor necrosis factor (ligand) superfamily, member 8       |
| 78              | NM_000546                 | <i>TP53</i>      | Tumor protein p53                                          |
| 79              | NM_005426                 | <i>TP53BP2</i>   | Tumor protein p53 binding protein 2                        |
| 80              | NM_005427                 | <i>TP73</i>      | Tumor protein p73                                          |
| 81              | NM_003789                 | <i>TRADD</i>     | TNFRSF1A-associated via death domain                       |
| 82              | NM_021138                 | <i>TRAF2</i>     | TNF receptor-associated factor 2                           |
| 82              | NM_003300                 | <i>TRAF3</i>     | TNF receptor-associated factor 3                           |
| 84              | NM_001167                 | <i>XIAP</i>      | X-linked inhibitor of apoptosis                            |

Table S2. Sequences of primers used in qPCR reactions.

| Gene Name        | Forward Primer                          | Reverse Primer                           |
|------------------|-----------------------------------------|------------------------------------------|
| <i>BAG1</i>      | BAG1forward2: CACGACCTTCATGTTACCTCC     | BAG1reverse2: TTCTGAAAAGACTGTGGAACC      |
| <i>BAK1</i>      | BAK1forward: AGAGTTCAGACCATGTTGC        | BAK1reverse: CATGCTGGTAGACGTGTAGG        |
| <i>BCL2A1</i>    | BCL2A1forward: GAAGACGGCATCATTAACCTGG   | BCL2A1reverse: GTTTGCGCTTATCCATTCTCC     |
| <i>BCL2L2</i>    | BCL2L2forward: GTGTCAACAAGGAGATGGAACC   | BCL2L2reverse: CCGTATAGAGCTGTGAACTCC     |
| <i>CASP1</i>     | CASP1forward: TGGAAGACTCATTGAACATATGC   | CASP1reverse: CTGGCTGCTCAAATGAAAATCG     |
| <i>CRADD</i>     | CRADDforward: GGAGAAGCTGAAGAAGGCAAGG    | CRADDreverse: GTTAATCTGCCGGTCTGATGG      |
| <i>CYC5</i>      | CYC5forward: CGTTGAAAAGGGAGGCAAGC       | CYC5reverse: TCCATCAGTGTATCCTCTCC        |
| <i>MCL1</i>      | MCL1forward: AGTTCTTCCATGTAGAGGACC      | MCL1reverse: TTAGATATGCCAAACCAGCTCC      |
| <i>NAIP</i>      | NAIPforward: CGAACTCCATTTAAACCACAGC     | NAIPreverse: CCTGAGACTCAAGAGATTCC        |
| <i>TNFRSF1B</i>  | TNFRSF1Bforward: CATGCAAAAAGTCTTCTGTACC | TNFRSF1Breverse: GAGTGCAGGCTTGAGTTTCC    |
| <i>TNFRSF21</i>  | TNFRSF21forward: GGCTGAAGAAATCCATGACTCC | TNFRSF21reverse: CTGTGTACCCATTGGAGAAAAGC |
| <i>TNFRSF9</i>   | TNFRSF9forward2: GTGAATGGGACGAAGGAGAGG  | TNFRSF9reverse2: TTAACAACAGAGAAAACGGAGC  |
| <i>TP53</i>      | TP53forward: GCTCTGACTGTACCACCATCC      | TP53reverse: CACGCACCTCAAAGCTGTTC        |
| <i>RNA18S5</i> * | 18sRNA-F:GTAACCCGTTGAACCCCAT            | 18sRNA-R: CCATCCAATCGGTAGTAGCG           |
| <i>ACTB</i> **   | ACTB-ex3-RT-U: CGGCATCGTCACCAACTG       | ACTB-ex4-RT-L: GCTGGGTGTTGAAGGTCTC       |
| <i>SRSF2</i>     | SRSF2_Oligo_F: CAAGTCCAGATCCGCACGAA     | SRSF2_Oligo_R: ACCATTTCTTAAGAGACACCG     |

\*—Published previously: [58]; \*\*—Published previously: [76].

**Table S3.** Prediction of binding sites for E2F1 and RelA in promoters of apoptotic genes.

| Gene Symbol     | Gene ID (NCBI Entrez Gene) | Transcription Factor (TF) | TF Binding Site Position |
|-----------------|----------------------------|---------------------------|--------------------------|
| <i>TNFRSF9</i>  | 3604                       | E2F1                      | no binding sites         |
|                 |                            | RelA                      | 8000968                  |
| <i>TNFRSF1B</i> | 7133                       | E2F1                      | 12227220                 |
|                 |                            |                           | 12212514                 |
|                 |                            | RelA                      | 12225636                 |
|                 |                            |                           | 12228510                 |
| <i>CRADD</i>    | 8738                       | E2F1                      | 94071462                 |
|                 |                            | RelA                      | 94072785                 |
| <i>BCL2L2</i>   | 599                        |                           | 23770576                 |
|                 |                            | E2F1                      | 23771401                 |
|                 |                            |                           | 23777283                 |
|                 |                            | RelA                      | no binding sites         |
| <i>BCL2A1</i>   | 597                        | E2F1                      | no binding sites         |
|                 |                            |                           | 7572973                  |
| <i>TP53</i>     | 7157                       | E2F1                      | 7578458                  |
|                 |                            |                           | 7604850                  |
|                 |                            | RelA                      | 7590854                  |

The table shows results of analysis performed with SABiosciences' proprietary database (DECODE, DECipherment Of DNA Elements [77]).

**Table S4.** Sequences of primers used in PCR reactions.

| Gene Name               | Forward Primer                          | Reverse Primer                          |
|-------------------------|-----------------------------------------|-----------------------------------------|
| <i>BCL2L11 (BIM)</i>    | BIMex1-splic-F: ACTTGATTCTTGCCAGCCACC   | BIMex8-splic-R: TAAGCGTTAAACTCGTCTCC    |
| <i>BID *</i>            | BID-EL-splic-F: AACAAATACGAATGTGCAGC    | BIDex9-splic-R: GCTCCGTCTACTGGAAGC      |
|                         | BID-L-splic-F: GCCATAAGGAGGAAGCGGGTAG   |                                         |
|                         | BID-S-splic-F: CAAGTGCTGAGGAAGAAACG     |                                         |
| <i>BIRC5 (survivin)</i> | Surwiwina-splic-F: GCCCTTCTCAAGGACCACC  | Surwiwina-splic-R: TGGCACGGCGCACTTTCTCC |
| <i>CASP8 **</i>         | Casp8-F: GGGATACTGTCTGATCATCAAC         | Casp8-R: GGAGAGGATACAGCAGATGAA          |
| <i>CASP9 ***</i>        | Casp9-F: GCTCTTCCTTTGTCATCTCC           | Casp9-R: CATCTGGCTCGGGTTACTGC           |
| <i>CFLAR</i>            | cflipL-F: CAGCGATGAAGAATGTGG            | cflipL-R: TGTGTAGGAGAGGATAAG            |
|                         | cflipS-F: GGACAAGTTACAGGAATG            | cflipS-R: AGAATGATTAAGTAGAGG            |
| <i>DFFA (ICAD)</i>      | ICAD-L/S-splic-F: CGAGCCACATCCTTACTGC   | ICAD-L/S-splic-R: AGTCTCCGTCTTCTTATGTC  |
| <i>DIABLO</i>           | Smac3-splic-F: ACTGTGACGATTGGCTTTGG     | Smac3-splic-R: CCTCTGTGTTTTCTGACGG      |
| <i>FAS</i>              | FasExo6Del-splic-F: GACCCAGAATACCAAGTGC | FasExo6Del-splic-R: GCATGTTTTCTGACTTCC  |
| <i>FASLG</i>            | FASLG-splic-F: GGTGTTCCCTTAGCTATG       | FASLG-splic-R: TGGTAAGATTGAACACTGC      |
| <i>MCL1</i>             | MCL1-splic-F: GAGTTGGTCGGGAATCTGG       | MCL1-splic-R: AGTCTCTCCATAGCTTCC        |
| <i>TNFSF10 (TRAIL)</i>  | TRAIL-splic-F: AGACTCTGACAGGATCATGG     | TRAIL-splic-R: GACCTCTTCTCTCACTAGG      |
| <i>HPRT1</i>            | HPRT1ex2RTU: TGGCGTCGTGATTAGTGATG       | HPRT1ex3RTL: CAGAGGGCTACAATGTGATG       |

\*—Three splice variants of BID (BID-EL, BID-L, and BID-S) were analysed using three different forward primers and one reverse primer common for the three analysed transcripts; \*\*—Primers for CASP8 were previously published by [15]; \*\*\*—Primers for CASP9 were previously published by [78].
